# Supplementary material for: Influence of aluminum incorporation and aqueous conditions on metal ion release of high-Ni transition metal oxide nanomaterials
Source: Royal Society of Chemistry journal article supplement (doi:10.1039/d3en00304c), 2023-11-07
Supplement: d3en00304c1.pdf [file d3en00304c1.pdf]

## Supplemental Information

### PXRD of NCA hydroxide precursor.

Figure S1 shows the powder XRD pattern of the NCA hydroxide precursor that forms from the initial coprecipitation reactions. Subsequent processing steps using the molten salt method convert this hydroxide into the oxide used for the studies here.

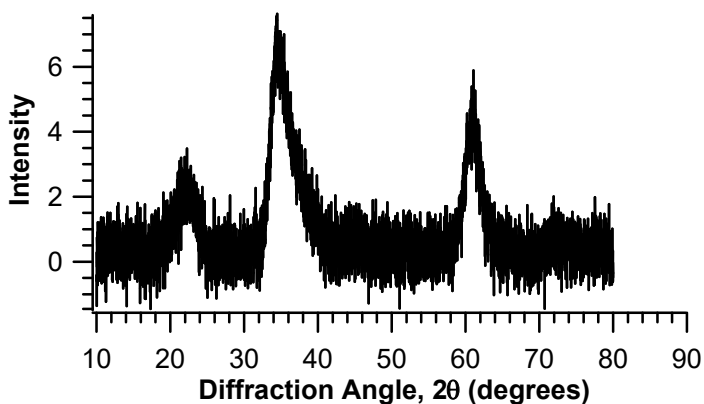

**Figure S1:** Powder XRD pattern of the NCA hydroxide synthesized using a coprecipitation reaction.

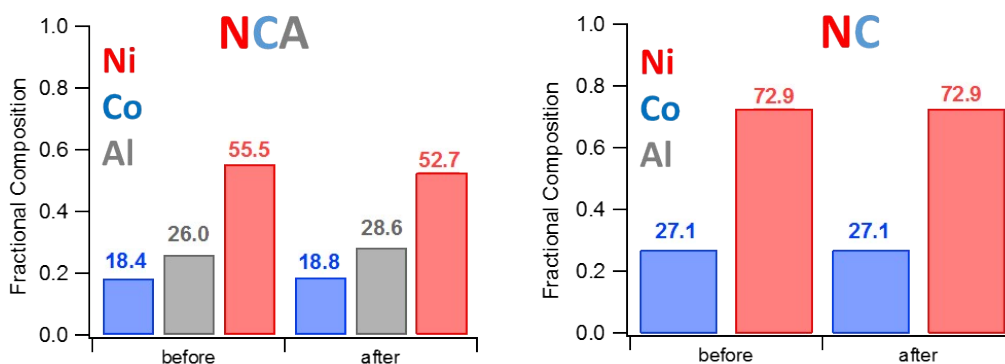

**Figure S2: XPS analysis of nanoparticle surfaces before and after incubation in moderately hard reconstructed water (MHRW).**

Fractional composition of metal species at the surface of NC and NCA nanoparticles before and after 72 h incubation in MHRW for 72 h. 50 mg/L nanoparticles were incubated in medium and then washed with nanopure water three times prior to XPS analysis. Fractional composition is shown for (f) Ni and Co in NC and (g) Ni, Co and Al in NCA.

### XPS of NC(A) in MHRW

Fractional composition  $X_i$  for different elements  $i$  was calculated as:

$$X_i = \frac{\frac{A_i}{S_i}}{\sum_j \frac{A_j}{S_j}}$$

where  $A_i$  refers to the XPS peak area of element  $i$ ,  $S_i$  is the atomic sensitivity factor for element  $i$ , and the sum in the denominator is taken over Al, Co, and Ni only. This fractional composition is a semiquantitative measure of the amount of each metal detected at the nanoparticle surface but has systematic errors because it does not take into account the different inelastic mean free paths of photoelectrons from the different elements. Notably, since Al has a high photoelectron energy, the calculated fractional compositions overestimate the amount of Al in the materials. Despite this systematic error, changes in the compositions due to exposure to different media would still be expected to be qualitatively correct.

## XPS of NC(A) in Minimal Media

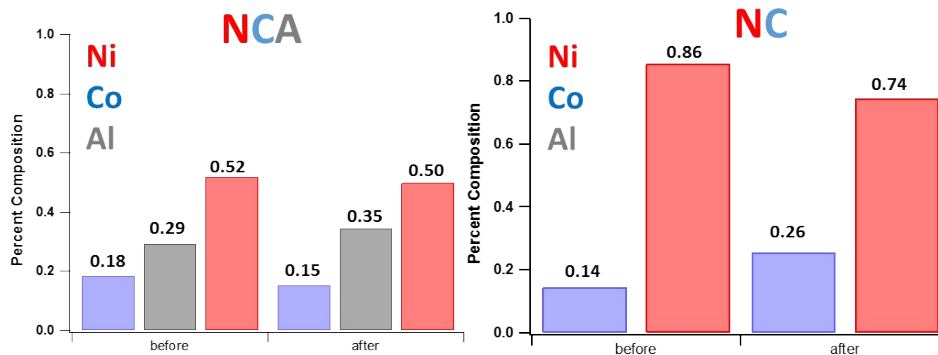

**Figure S3: XPS analysis of nanoparticle surfaces before and after incubation in minimal medium (MM).** Fractional composition of metal species at the surface of NC and NCA nanoparticles before and after 72 h incubation in MM for 72 h. 50 mg/L nanoparticles were incubated in medium and then washed with nanopure water three times prior to XPS analysis. Fractional composition is shown for (f) Ni and Co in NC and (g) Ni, Co and Al in NCA.

## NC(A) Surface Models

NC-NN-1

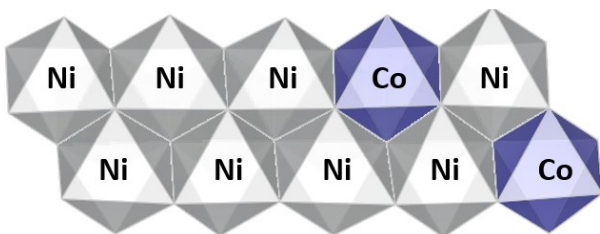

NC-NN-2

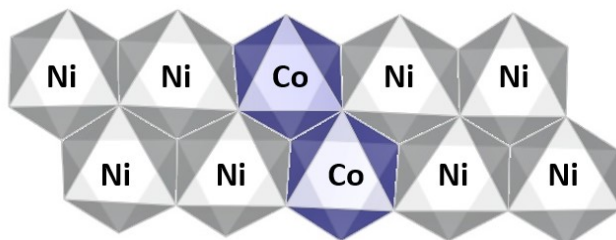

NC-nNN

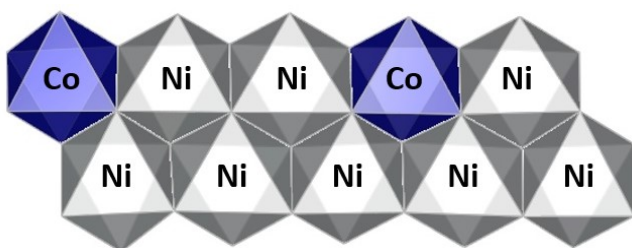

NCA-NN-1

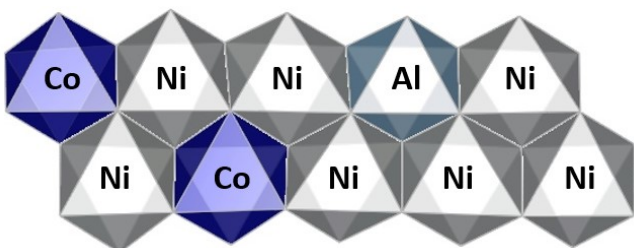

NCA-NN-2

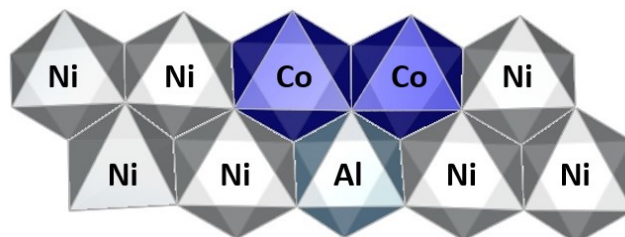

NCA-NN-3

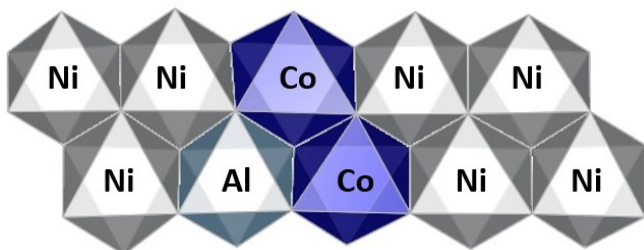

NCA-nNN

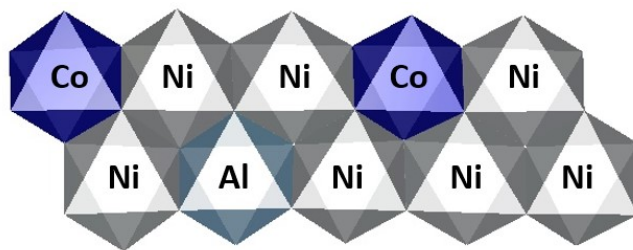

**Figures S4:** Top-down views of NC(A) surface models with Ni, Co, and Al shown as grey, dark blue, and light blue polyhedron, respectively.

## Layer Spacing Comparison between NC and NCA

Table S1: O-Li-O and O-M-O comparisons between NN and nNN configurations for NC and NCA models.

|            | NC-NN | NCA-NN | % Change | NC-nNN | NCA-nNN | % Change |
|------------|-------|--------|----------|--------|---------|----------|
| O-Li-O (Å) | 2.65  | 2.66   | 0.38     | 2.65   | 2.66    | 0.25     |
| O-M-O (Å)  | 2.09  | 2.08   | -0.48    | 2.09   | 2.08    | -0.37    |

Examining our NC and NCA models we observed no significant structural changes. Our model uses a composition of NCA with 10% Al which is on the high end of dopant amount suggesting anything less would also not have a large change on the structure of the parent NC material.

## DFT + Solvent Ion Model

This approach breaks down the energy of a total reaction,  $\Delta G_T$ , into two groups of terms. The first group of terms term is determined entirely using DFT total energy values, with corresponding changes in energy denoted as  $\Delta G_1$ . As in previous work[54], we go from DFT total energies to Gibbs free energies using zero-point energy and TΔS corrections. Based on the following model reactions, we represent the removal of an  $M$ -OH unit, where  $M = \text{Ni, Al, or Co}$ , from the lattice. This release unit has shown to be the favorable leaving group in previous studies and the approach is adopted here.

**Eq S1.** 
$$\Delta G_1: E(\text{LiMO}_2)_{\text{Ni-OH}} \rightarrow E(\text{LiMO}_2)_{\text{---}} + E(\text{Ni}_{(s)}) + E\left(\frac{1}{2}\text{O}_{2(g)}\right) + E\left(\frac{1}{2}\text{H}_{2(g)}\right)$$

In this fashion,  $\Delta G_1$  can be interpreted as the energy penalty to remove the  $M$ -OH unit from the lattice, where a more negative value represents a more favorable process. We can systematically vary chemical environments between NC and NCA to determine the effects of aluminum doping on the release process. For example, in this work we compare Ni removal from NC where a neighboring Ni atom is replaced with Al in NCA.

The values for the second group of terms in the DFT Solvent Ion model,  $\Delta G_2$ , are obtained from tabulated values of  $\Delta G_{SHE}^0$  with additional correction terms for pH and concentration based on

the Nernst equation as shown in **Eq. S2**. The additional terms allow us to tune our model to relate our calculations better to the environmental conditions of the dissolution experiment.

**Table S2:** SHE values for the solvation of the solid metals to their aqueous cations.

| (eV)                     | Co <sup>2+</sup> | Ni <sup>2+</sup> | Al <sup>3+</sup> |
|--------------------------|------------------|------------------|------------------|
| $\Delta G_{SHE}^{\circ}$ | -0.56            | -0.47            | -5.03            |

**Eq S2** 
$$\Delta G_2 = \Delta G_{SHE}^0 - n_e e U_{SHE} - 0.0591 n_H pH + 0.0257 \ln a (H_x A O_y^{z-})$$

$\Delta G_{SHE}^0$  accounts for the free energy change upon hydrolysis of the standard state products in  $\Delta G_1$  in reference to the Standard Hydrogen Electrode (SHE).

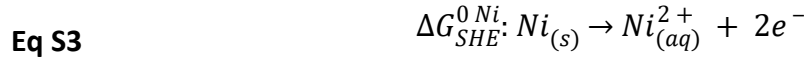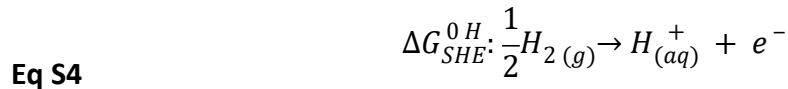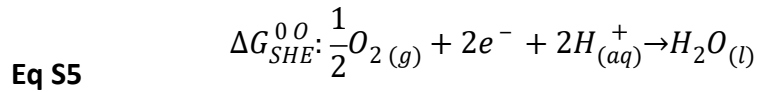

The media-dependent dissolution results suggest that reactions in solution may thermodynamically promote or hinder cation release in a metal-dependent fashion. To this end, we modeled the energetics of ligand exchange reactions involving the hydrated cation forms of released metals and known chelating species present in the media. These aqueous chemistry effects on the release were modeled using molecular (non-periodic) DFT calculations at the GGA-PBE level of theory using DMol<sup>3</sup> software.[57, 58] DNP basis functions were used to expand the Kohn-Sham orbitals[59] on a fine numerical integration grid. Using the conductor-like screening model (COSMO) as implemented in the DMol<sup>3</sup> package,[60] an implicitly solvated aqueous environment was modeled.

The solution effects add on to the DFT Solvent-Ion framework as elementary steps that result in the formation of complexed metal ions, which introduces an additional term denoted as  $\Delta G_3$ .  $\Delta G_3$  is the sum of the energetics of products minus those of reactants for the ligand exchange

reaction between the hydrolyzed metal and the ligating species present in the media (**Eq S6.6-7**).

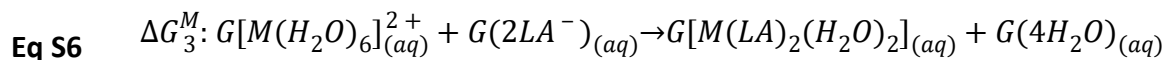

Al leaves in  $Al^{3+}$  state, thus its equation differs by a positive charge. For Al, the reaction was modeled as:

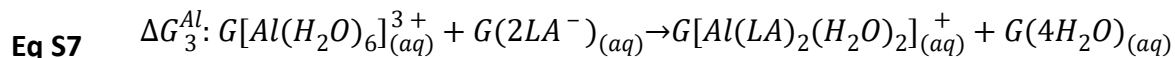

In a previous study on the Ni-enriched 811-NMC,[56] it was shown that a bi-lactate ligated form of Ni and Co is more energetically favorable than the mono-lactate ligated complex. For comparison, we assumed the same degree of ligation for Al. Our bi-lactate ligated metals are all *trans* isomers as this isomer was more stable than the *cis* isomer.

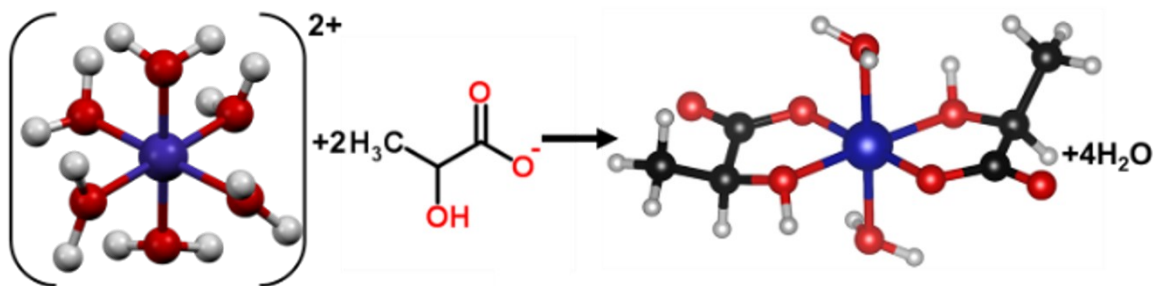

**Figure S5:**  $\Delta G_3$  reaction for hexa-aqua ligated cation undergoing a ligand exchange with lactate to form the *trans* isomer.

## $\Delta G_T$ Tables for M-OH Release

**Table S3:**  $\Delta G_T$  for NC at pH 7 for Ni and Co and their differences with and without lactate.

| NC                          | $\Delta G_T$ (eV) | $\Delta(\Delta G_T)$ (eV) | $\Delta G'_T$ (eV) | $\Delta(\Delta G'_T)$ (eV) |
|-----------------------------|-------------------|---------------------------|--------------------|----------------------------|
| NN-A-Ni <sup>5Ni-1Co</sup>  | -3.75             | 1.21                      | -4.71              | 0.80                       |
| NN-A-Co <sup>5Ni-1Co</sup>  | -2.54             |                           | -3.91              |                            |
| NN-B-Ni <sup>3Ni-3Co</sup>  | -3.36             | 0.75                      | -4.32              | 0.34                       |
| NN-B-Co <sup>5Ni-1Co</sup>  | -2.61             |                           | -3.98              |                            |
| NN-C-Ni <sup>4Ni-2Co</sup>  | -2.99             | 0.72                      | -3.95              | 0.31                       |
| NN-C-Co <sup>4Ni-2Co</sup>  | -2.27             |                           | -3.64              |                            |
| nNN-A-Ni <sup>4Ni-2Co</sup> | -3.55             | 0.58                      | -4.51              | 0.17                       |
| nNN-A-Co <sup>6Ni</sup>     | -2.97             |                           | -4.34              |                            |

**Table S4:**  $\Delta G_T$  for NCA at pH 7 for Ni and Co and their differences with and without lactate.

| NCA                             | $\Delta G_T$ (eV) | $\Delta(\Delta G_T)$ (eV) | $\Delta G'_T$ (eV) | $\Delta(\Delta G'_T)$ (eV) |
|---------------------------------|-------------------|---------------------------|--------------------|----------------------------|
| NN-A-Ni <sup>4Ni-2Al</sup>      | -3.05             | 0.59                      | -4.01              | 0.18                       |
| NN-A-Co <sup>5Ni-1Co</sup>      | -2.46             |                           | -3.83              |                            |
| NN-B-Ni <sup>6Ni</sup>          | -4.22             | 0.86                      | -5.18              | 0.45                       |
| NN-B-Co <sup>4Ni-1Co-1Al</sup>  | -3.36             |                           | -4.73              |                            |
| NN-C-Ni <sup>5Ni-1Al</sup>      | -3.33             | 0.67                      | -4.29              | 0.26                       |
| NN-C-Co <sup>3Ni-2Co-1Al</sup>  | -2.66             |                           | -4.03              |                            |
| nNN-A-Ni <sup>4Ni-2Co</sup>     | -3.33             | 0.66                      | -4.29              | 0.25                       |
| nNN-A-Co <sup>6Ni</sup>         | -2.67             |                           | -4.04              |                            |
| nNN-A-Ni <sup>4Ni-1Co-1Al</sup> | -3.23             | 0.56                      | -4.19              | 0.15                       |
| nNN-A-Co <sup>6Ni</sup>         | -2.67             |                           | -4.04              |                            |

**Table S5:**  $\Delta G_T$  for NCA at pH 4 for Ni and Al and their differences with and without lactate.

| NCA                      | $\Delta G_T$ (eV) | $\Delta(\Delta G_T)$ (eV) | $\Delta G'_T$ (eV) | $\Delta(\Delta G'_T)$ (eV) |
|--------------------------|-------------------|---------------------------|--------------------|----------------------------|
| NN-Ni <sup>3Ni-3Co</sup> | -5.24             | 1.12                      | -6.20              | 0.05                       |



|                            |       |      |       |      |
|----------------------------|-------|------|-------|------|
| NN-Al <sup>6</sup> Ni      | -4.12 |      | -6.25 |      |
| nNN-Ni <sup>5</sup> Ni-1Al | -4.88 | 1.23 | -5.84 | 0.06 |
| nNN-Al <sup>4</sup> Ni-2Co | -3.65 |      | -5.78 |      |
| nNN-Ni <sup>4</sup> Ni-1Co | -4.29 | 1.03 | -5.25 | 0.14 |
| nNN-Al <sup>5</sup> Ni-1Co | -3.26 |      | -5.39 |      |

### TEM Analysis of Nanoparticles

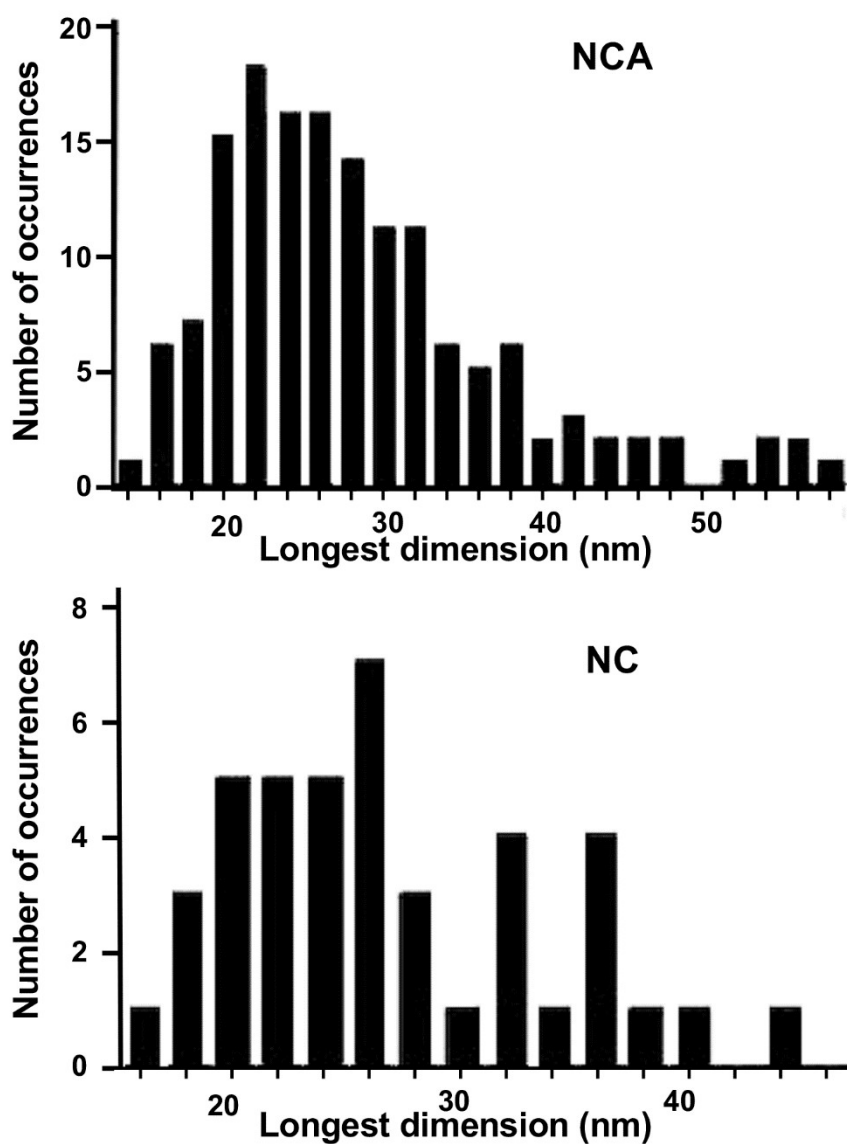

**Figure S6:** TEM analysis of nanoparticle size distributions for NCA and NC synthesized using the molten salt method at 450°C for 30 min.

## Projected Densities of States (PDOS) of Ni in NC and NCA Formulations

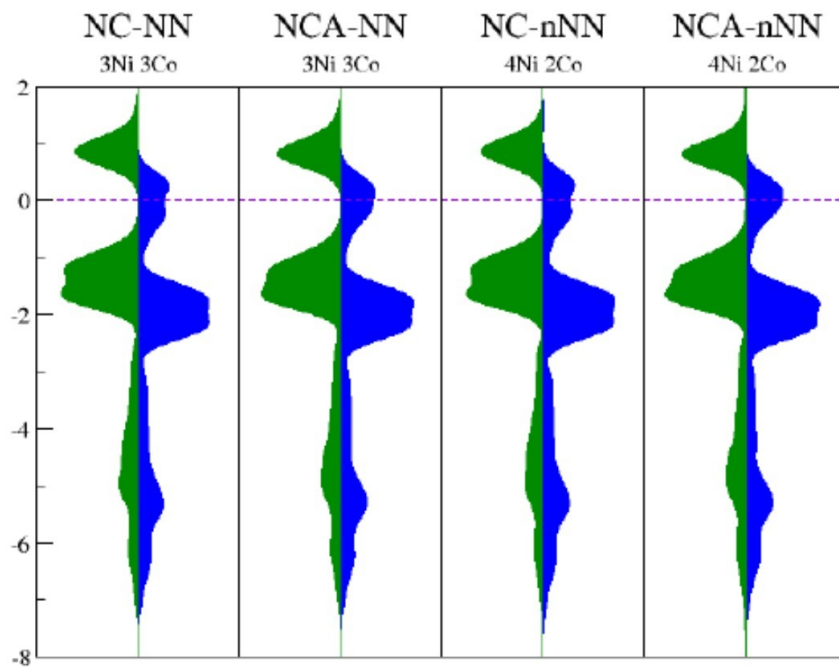

**Figure S7:** PDOS of Ni in NC and NCA compositions. Ni is present as a 3+ cation in NC with no changes observed after the addition of Al.

## Vibrational Mode Comparison between NC and NCA

**Table S6:** Vibrational mode comparison between NC and NCA. All NCA modes have larger  $\text{cm}^{-1}$  values indicating the addition of Al strengthens the bonding network.

| Mode | NC( $\text{cm}^{-1}$ ) | NCA ( $\text{cm}^{-1}$ ) | NCA-NC ( $\text{cm}^{-1}$ ) |
|------|------------------------|--------------------------|-----------------------------|
| 300  | 538.976                | 545.075                  | 6.099                       |
| 304  | 542.985                | 551.973                  | 8.987                       |
| 305  | 543.638                | 552.237                  | 8.598                       |
| 306  | 546.195                | 555.140                  | 8.945                       |
| 307  | 546.319                | 557.058                  | 10.73                       |
| 316  | 565.755                | 568.336                  | 2.581                       |
| 318  | 567.652                | 574.468                  | 6.816                       |
| 320  | 572.613                | 579.592                  | 6.979                       |
| 322  | 574.991                | 585.089                  | 10.09                       |
| 323  | 576.102                | 585.589                  | 9.486                       |
| 329  | 591.948                | 596.720                  | 4.771                       |
| 332  | 596.266                | 603.348                  | 7.082                       |
